# Supplementary material
Source: PubMed Central journal article supplement (PMC3267375)
Supplement: NIHMS344133-supplement-1_si_001.pdf [file NIHMS344133-supplement-1_si_001.pdf]

1 **Supporting Information**

2 **Isoprene Epoxydiols as Precursors to Secondary Organic Aerosol Formation: Acid-**  
3 **Catalyzed Reactive Uptake Studies with Authentic Compounds**

4

5 Ying-Hsuan Lin<sup>1</sup>, Zhenfa Zhang<sup>1</sup>, Kenneth S. Docherty<sup>2</sup>, Haofei Zhang<sup>1</sup>, Sri Hapsari  
6 Budisulistiorini<sup>1</sup>, Caitlin L. Rubitschun<sup>1</sup>, Stephanie L. Shaw<sup>3</sup>, Eladio M. Knipping<sup>4</sup>, Eric S.  
7 Edgerton<sup>5</sup>, Tadeusz E. Kleindienst<sup>6</sup>, Avram Gold<sup>1</sup>, Jason D. Surratt<sup>1,\*</sup>

8

9 <sup>1</sup> Department of Environmental Sciences and Engineering, Gillings School of Global Public  
10 Health, The University of North Carolina at Chapel Hill, NC, USA

11 <sup>2</sup> Alion Science and Technology, Research Triangle Park, NC, USA

12 <sup>3</sup> Electric Power Research Institute, Palo Alto, CA, USA

13 <sup>4</sup> Electric Power Research Institute, Washington, D. C., USA

14 <sup>5</sup> Atmospheric Research & Analysis, Inc., Cary, NC, USA

15 <sup>6</sup> National Exposure Research Laboratory, U.S. Environmental Protection Agency, Research  
16 Triangle Park, NC, USA

17 \* To whom correspondence should be addressed. Email: [surratt@unc.edu](mailto:surratt@unc.edu)

18

19 This supporting information contains 12 pages: 1 table, and 8 figures.

20 **Table S1. Summary of IEPOX-derived SOA Tracers Characterized in This Study.**

| IEPOX-derived SOA tracers                              | Analytical Techniques <sup>a</sup> | Tracer Ion ( <i>m/z</i> ) | Retention Time (min) |
|--------------------------------------------------------|------------------------------------|---------------------------|----------------------|
| 3-methyltetrahydrofuran-3, 4-diols (3-MeTHF-3,4-diols) | GC/EI-MS                           | 262                       | 22.20                |
|                                                        | GC/EI-MS                           | 262                       | 22.81                |
| C <sub>5</sub> -alkene triols                          | GC/EI-MS                           | 231                       | 27.30                |
|                                                        | GC/EI-MS                           | 231                       | 28.35                |
|                                                        | GC/EI-MS                           | 231                       | 28.71                |
| 2-methyltetrols                                        | GC/EI-MS                           | 219                       | 34.73                |
|                                                        | GC/EI-MS                           | 219                       | 35.58                |
| <b>dimers</b>                                          | GC/EI-MS                           | 335                       | 54.56                |
| organosulfate derivatives of the 2-methyltetrols       | UPLC/ESI-HR-Q-ToFMS                | 215                       | 1.115                |
| organosulfate derivatives of the <b>dimers</b>         | UPLC/ESI-HR-Q-ToFMS                | 333                       | 1.191                |

21 <sup>a</sup> Reaction products analyzed by GC/EI-MS are derivatized by trimethylsilylation.

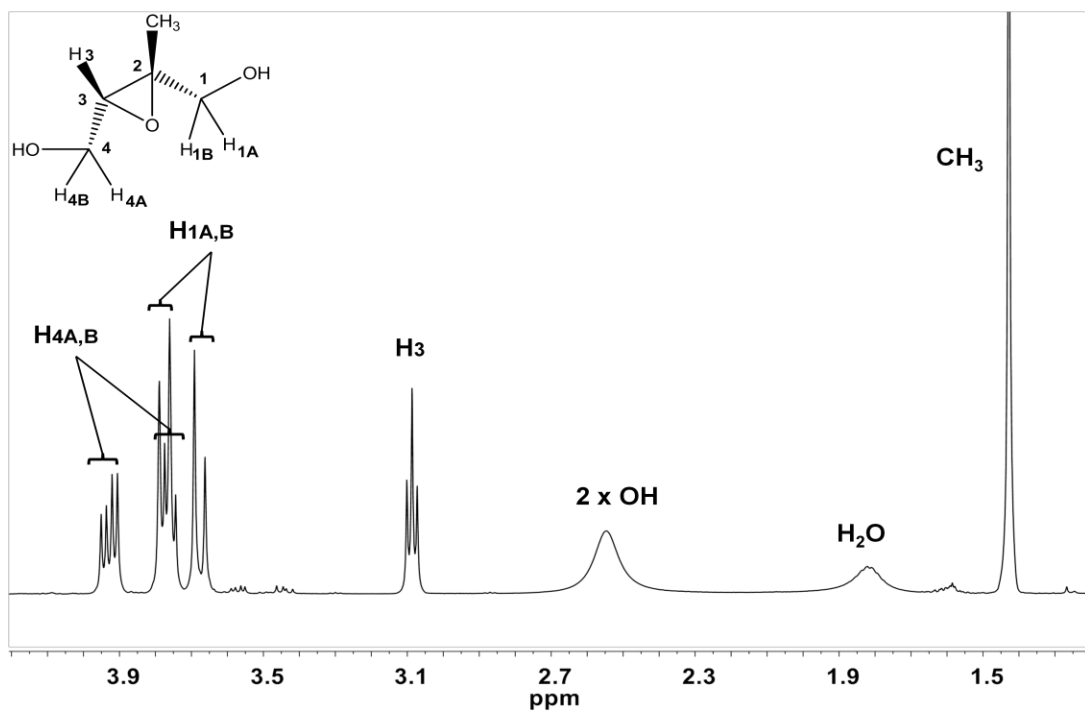

22

23 **Figure S1A.**  $^1\text{H}$  NMR (400 MHz,  $\text{chloroform-}d$ ) of (2-methyloxirane-2,3-diyl)dimethanol (*cis*- $\beta$ -  
 24 IEPOX).

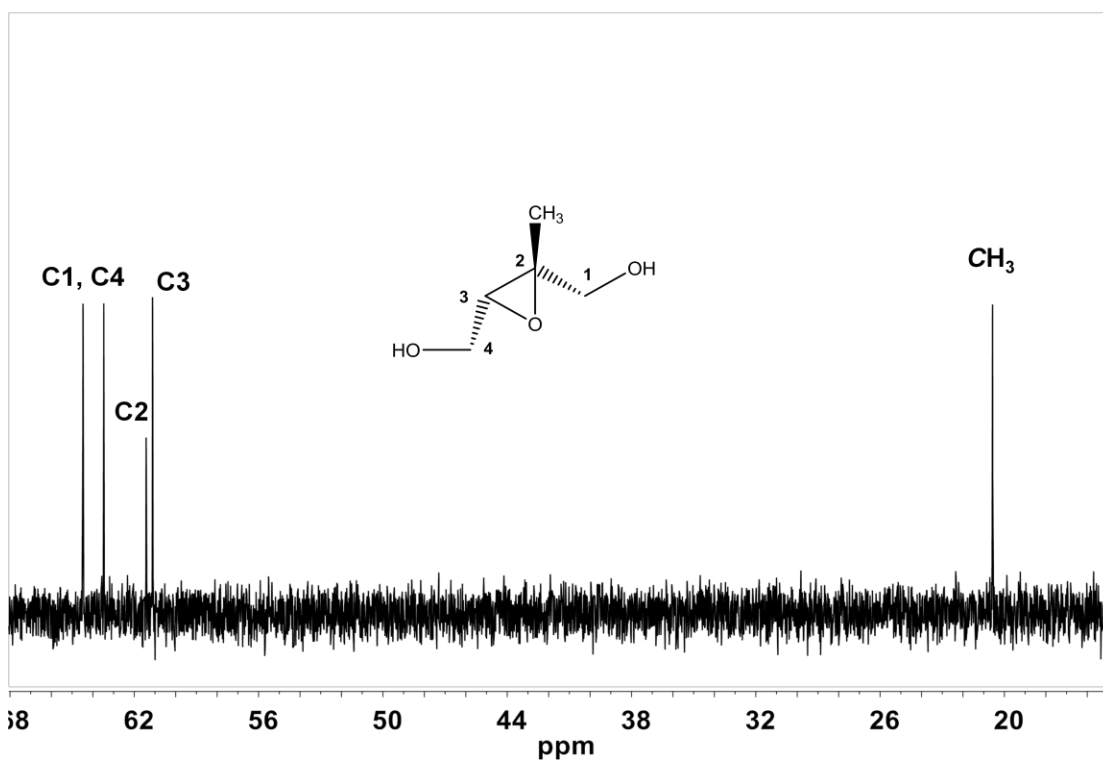

25

26 **Figure S1B.**  $^{13}\text{C}$  NMR (100 MHz,  $\text{chloroform-}d$ ), (2-methyloxirane-2,3-diyl)dimethanol(*cis*- $\beta$ -  
 27 IEPOX).

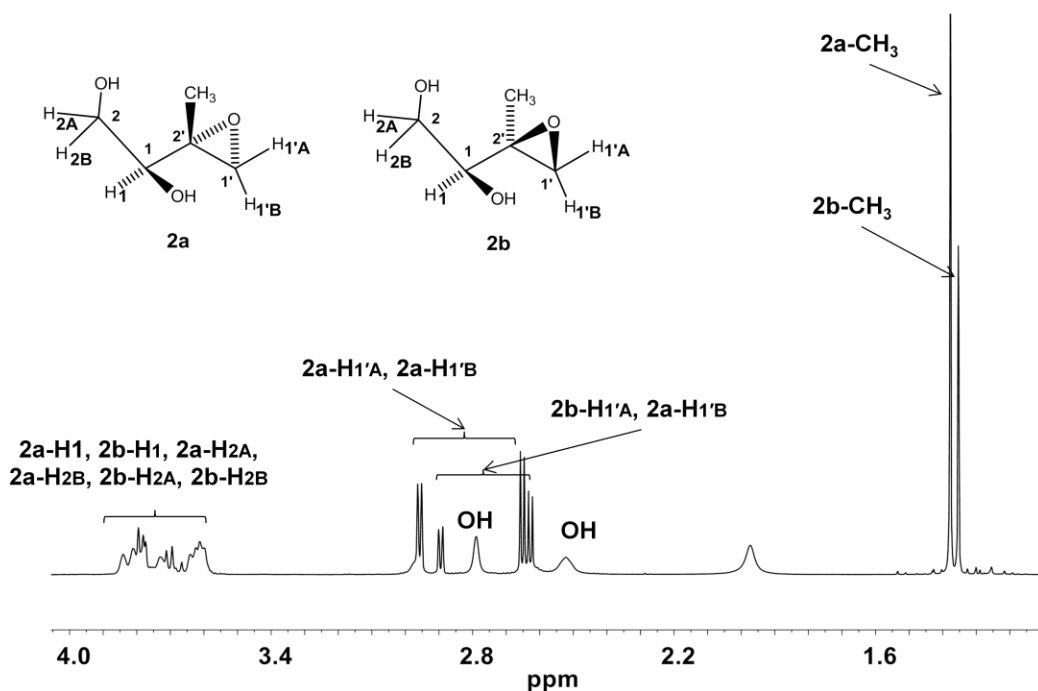

28

29 **Figure S1C.**  $^1\text{H}$  NMR (400 MHz, chloroform-*d*) racemic mixture of  $\delta$ -IEPOX diastereomers  
 30 [(2'*R*)-*IS*]/[(2'*S*)-*IR*]-1-(2-methyloxiranyl)-1,2-ethanediol (**2a**) and [(2'*S*)-*IS*]/[(2'*R*)-*IR*]-1-(2-  
 31 methyloxiranyl)-1,2-ethanediol (**2b**). Signal assignments are based on Adam et al.<sup>1</sup>

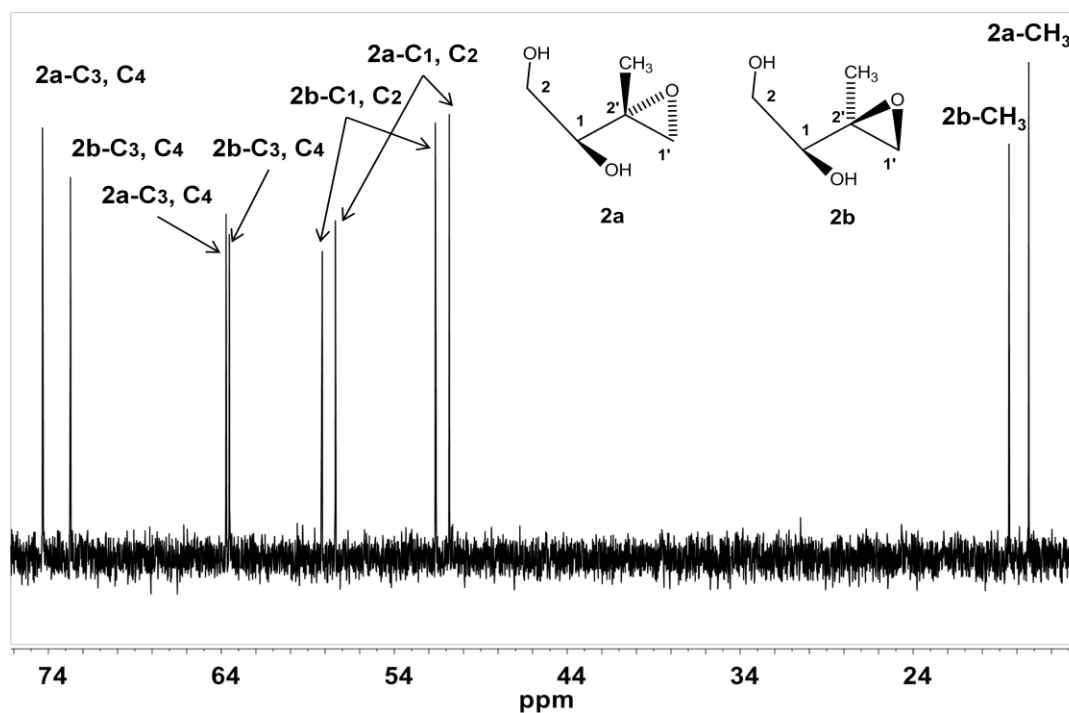

32

33 **Figure S1D.**  $^{13}\text{C}$  NMR (100 MHz, chloroform-*d*), racemic mixture of  $\delta$ -IEPOX diastereomers **2a**  
 34 and **2b** ([ (2'*R*)-*IS*]/[(2'*S*)-*IR*]- and [(2'*S*)-*IS*]/[(2'*R*)-*IR*]-1-(2-methyloxiranyl)-1,2-ethanediol,  
 35 respectively).

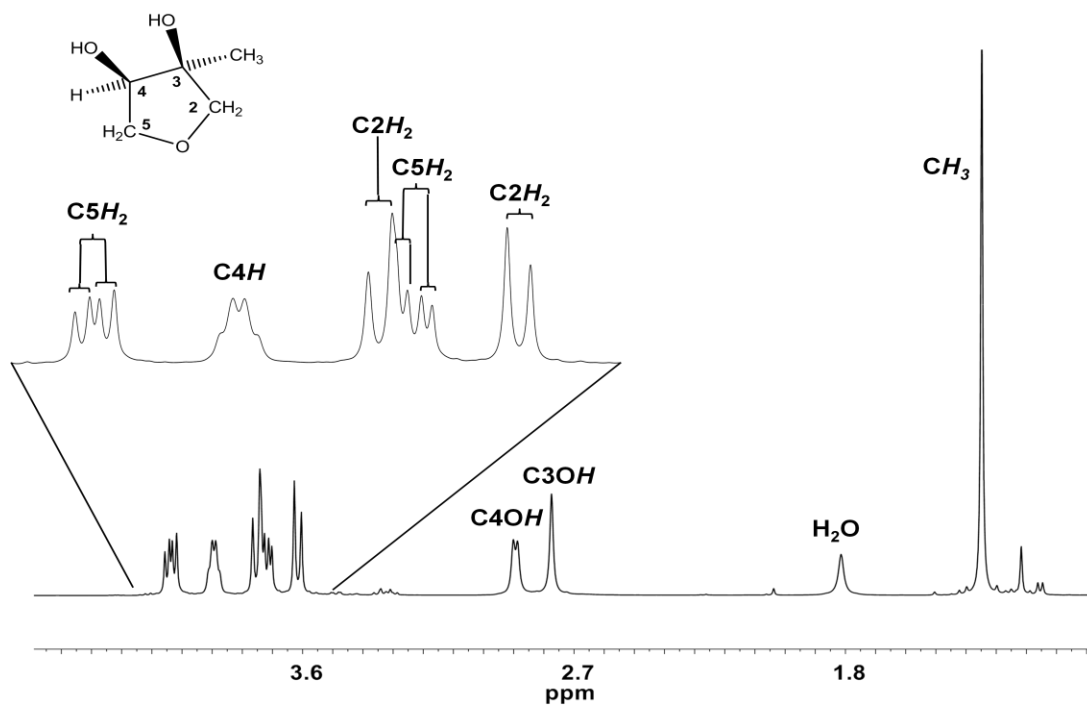

36

37 **Figure S2A.**  $^1\text{H}$  NMR (400 MHz), chloroform-*d*) of *cis*-3-methyltetrahydrofuran-3,4-diol.

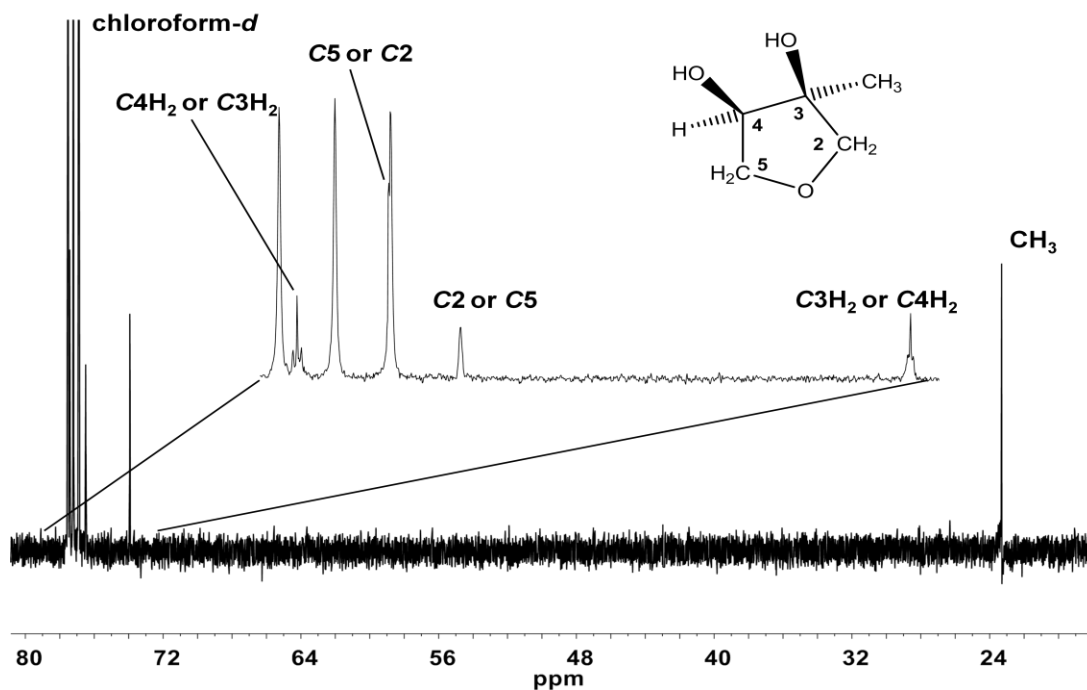

38

39 **Figure S2B.**  $^{13}\text{C}$  NMR (100 MHz, chloroform-*d*) of *cis*-3-methyltetrahydrofuran-3,4-diol. Partial  
 40 signal assignments are based on the presence of splittings consistent with  $^2J_{\text{C}-\text{H}}$  or  $^3J_{\text{C}-\text{H}}$   
 41 coupling,<sup>2</sup> possible only for signals of C3 and C4. The 1:1:1 triplet at 77.2 ppm is due to natural  
 42 abundance  $^{13}\text{C}$ -chloroform-*d*.

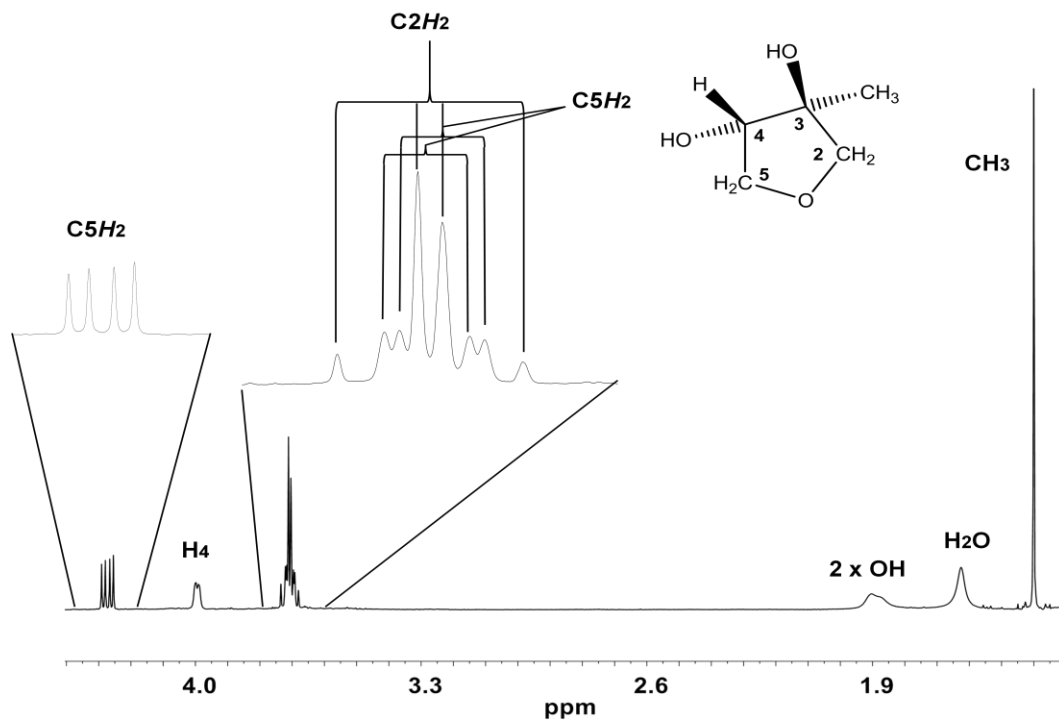

43

44 **Figure S2C.**  $^1\text{H}$  NMR (400 MHz), chloroform-*d*) of *trans*-3-methyltetrahydrofuran-3,4-diol.

45

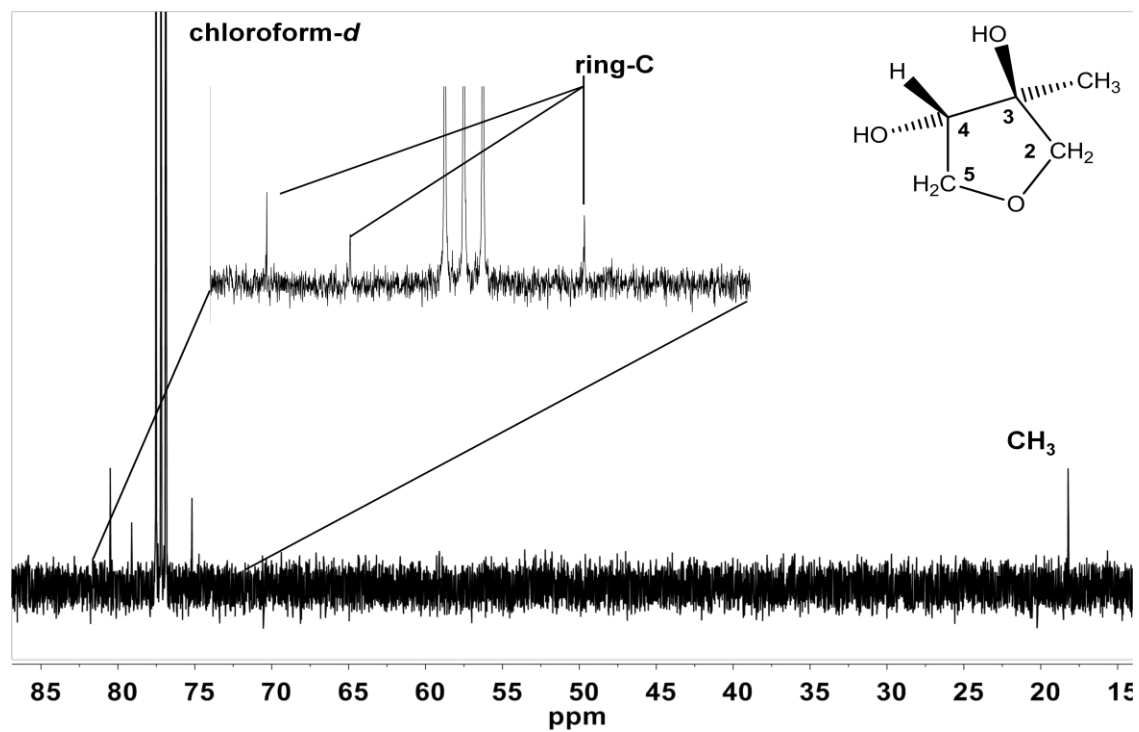

46

47 **Figure S2D.**  $^{13}\text{C}$  NMR (100 MHz), chloroform-*d*) of *trans*-3-methyltetrahydrofuran-3,4-diol.  
 48 One ring carbon signal is obscured by the  $^{13}\text{C}$ -chloroform-*d* signals.

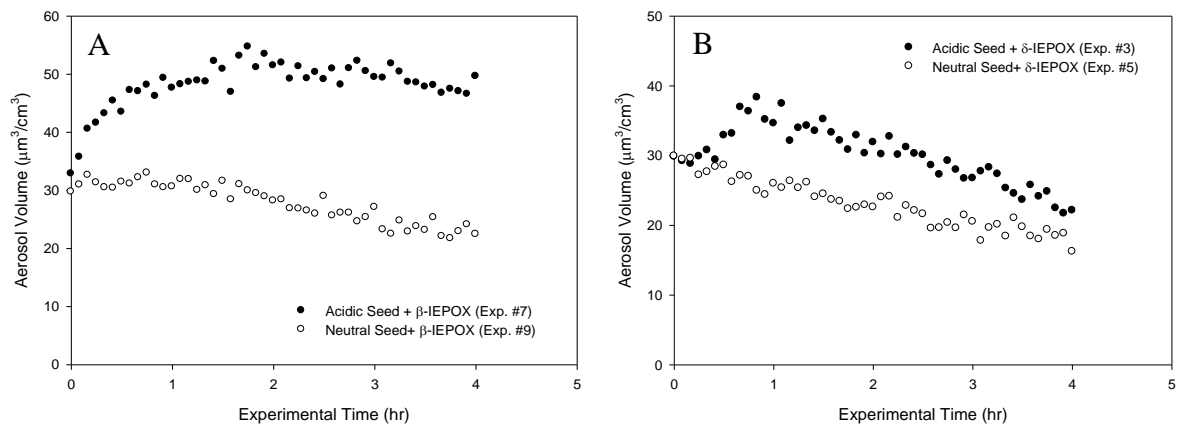

49  
 50 **Figure S3.** Evidence of SOA growth by acid-catalyzed reactive uptake from wall-loss  
 51 uncorrected SMPS data. (A)  $\beta$ -IEPOX and (B)  $\delta$ -IEPOX were introduced into the chamber with  
 52 heated  $\text{N}_2(\text{g})$  from time zero.

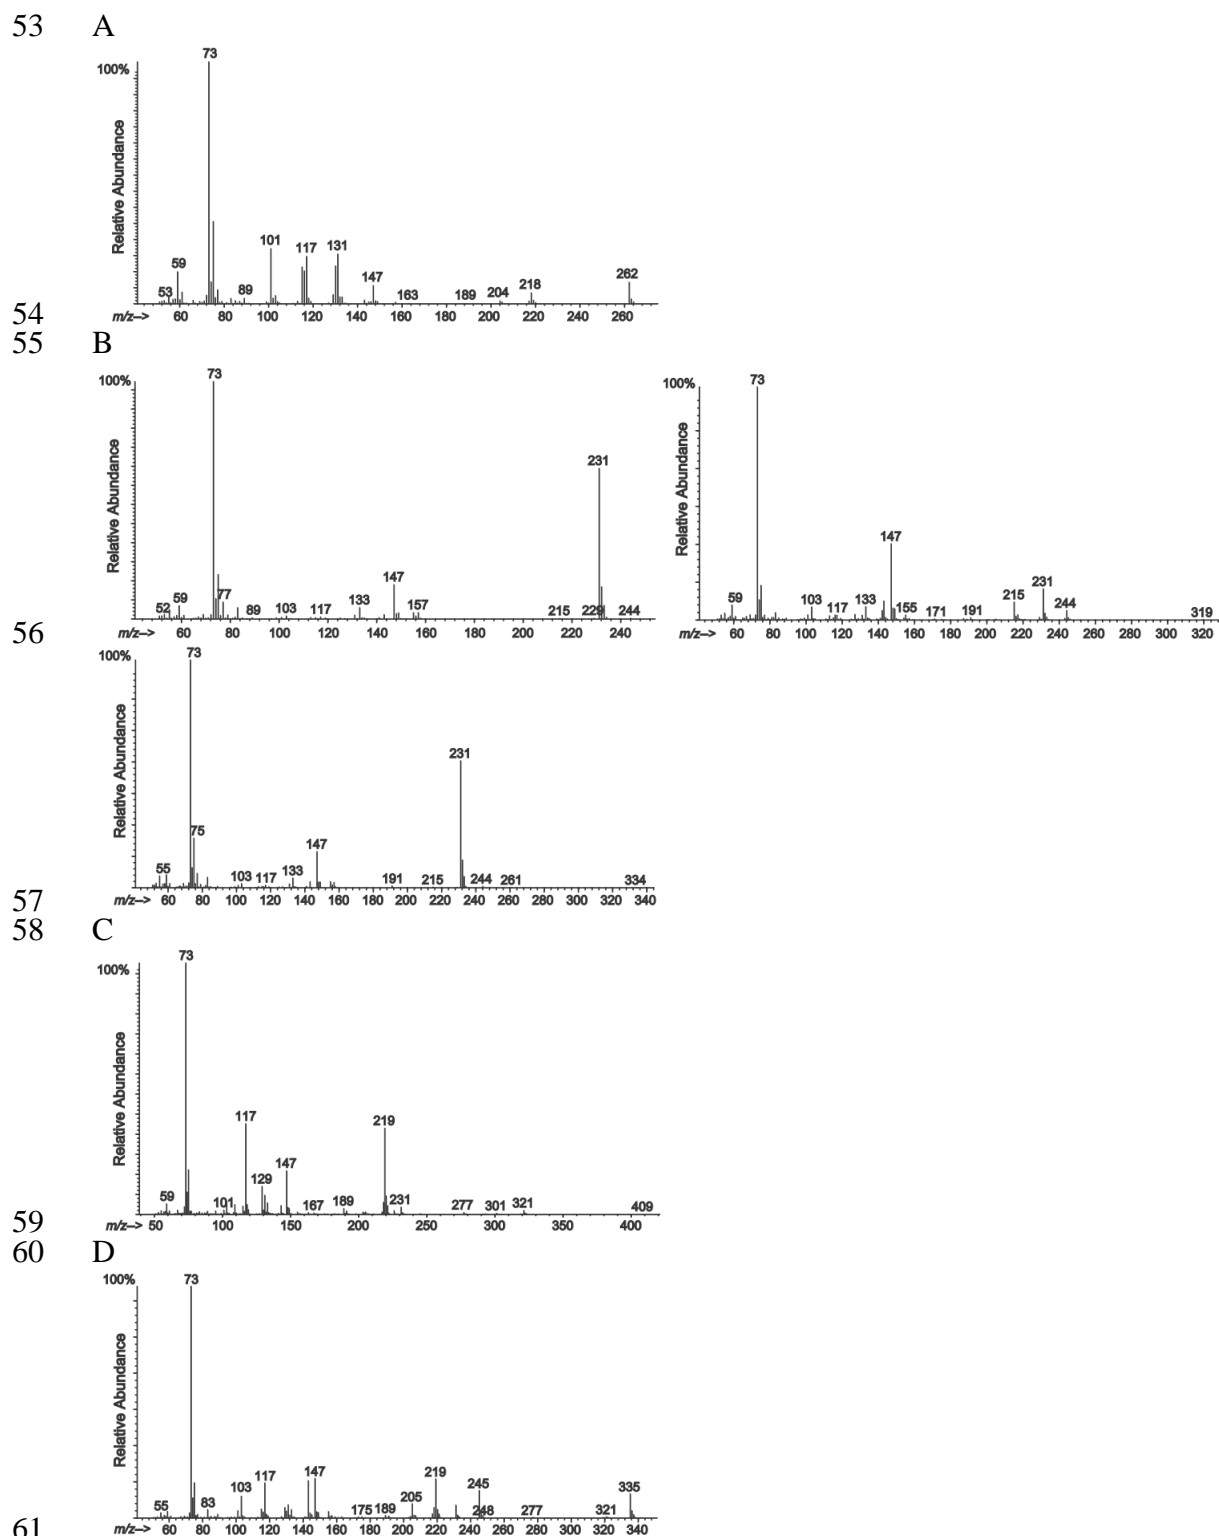

62 **Figure S4. GC/MS EI mass spectra** corresponding to reaction products formed in acidic seed  
 63 aerosol from reactive uptake of *cis*- $\beta$ -IEPOX. (A) EIC of  $m/z$  262: 3-MeTHF-3,4-diol (B) EIC of  
 64  $m/z$  231: C<sub>5</sub>-alkene triols (C) EIC of  $m/z$  219: 2-methyltetrols (D) EIC of  $m/z$  335: **dimers**.



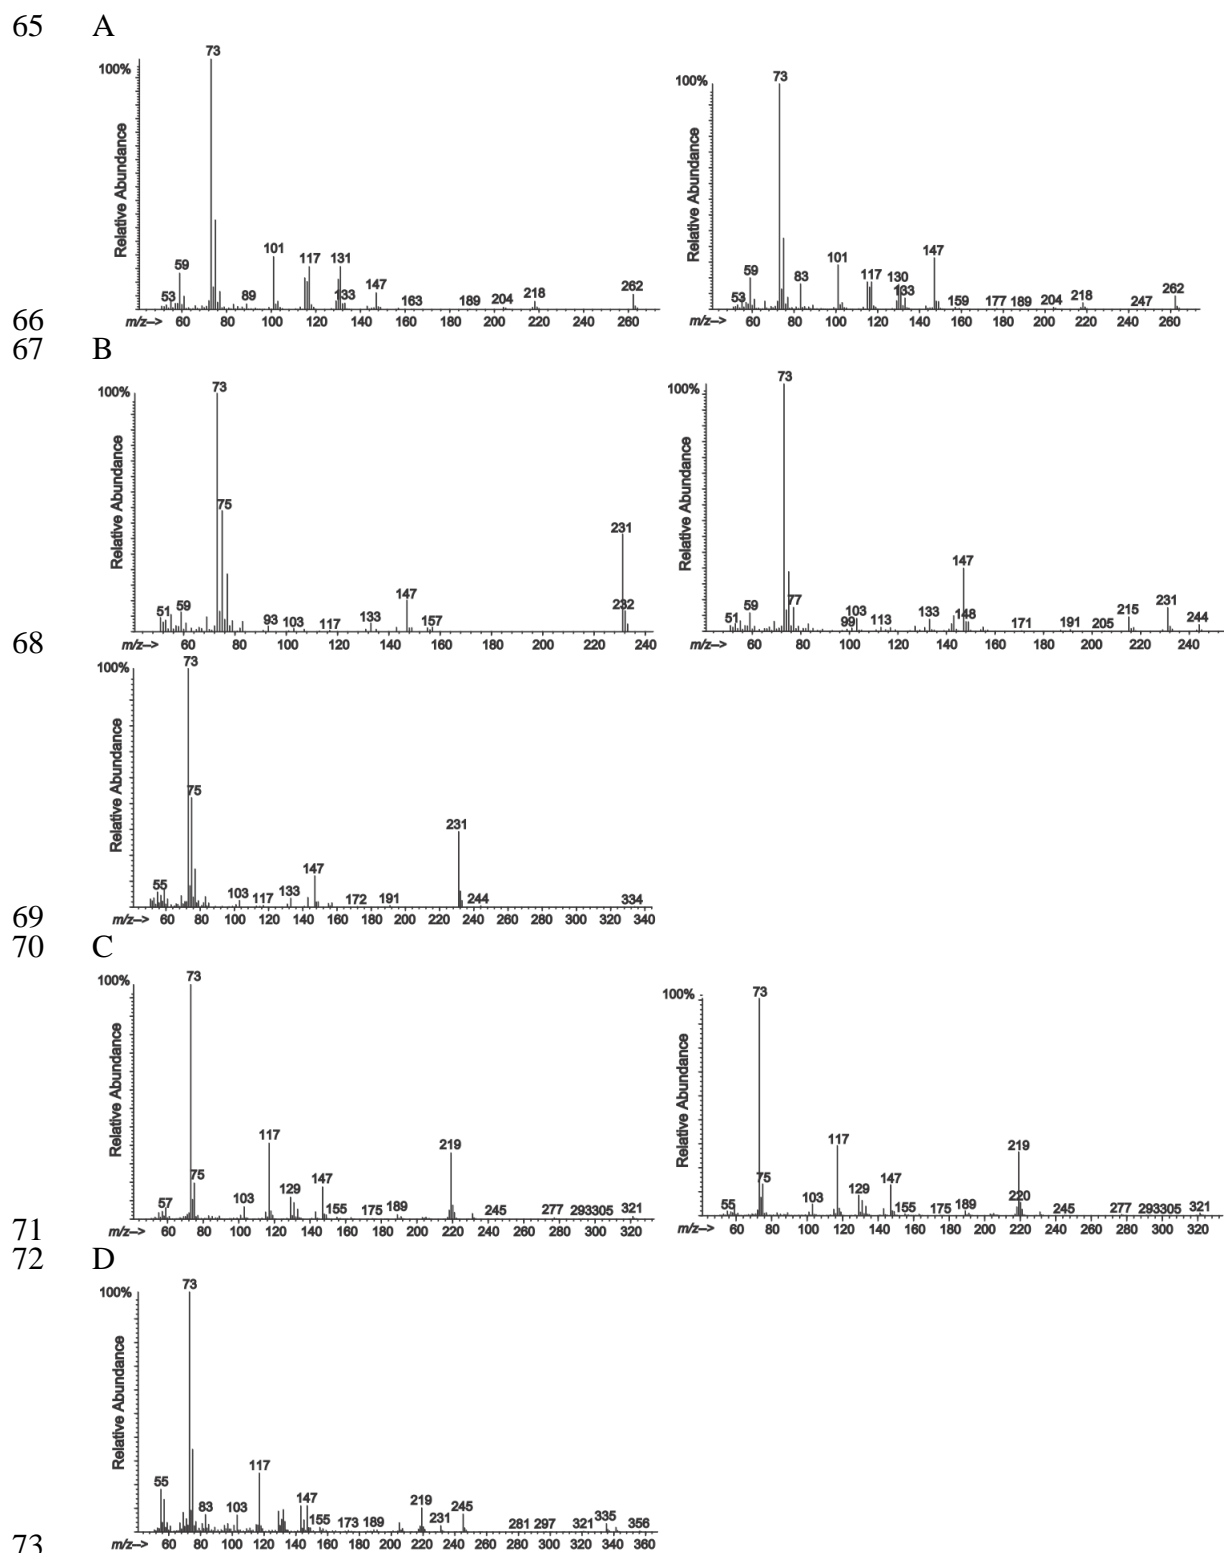

74 **Figure S5. GC/MS EI mass spectra** corresponding to aerosol-phase reaction products formed in  
 75 acidic seed aerosol from reactive uptake of  $\delta$ -IEPOX. (A) EIC of  $m/z$  262: 3-MeTHF-3,4-diols  
 76 (B) EIC of  $m/z$  231:  $C_5$ -alkene triols (C) EIC of  $m/z$  219: 2-methyltetrols (D) EIC of  $m/z$  335:  
 77 **dimers.**

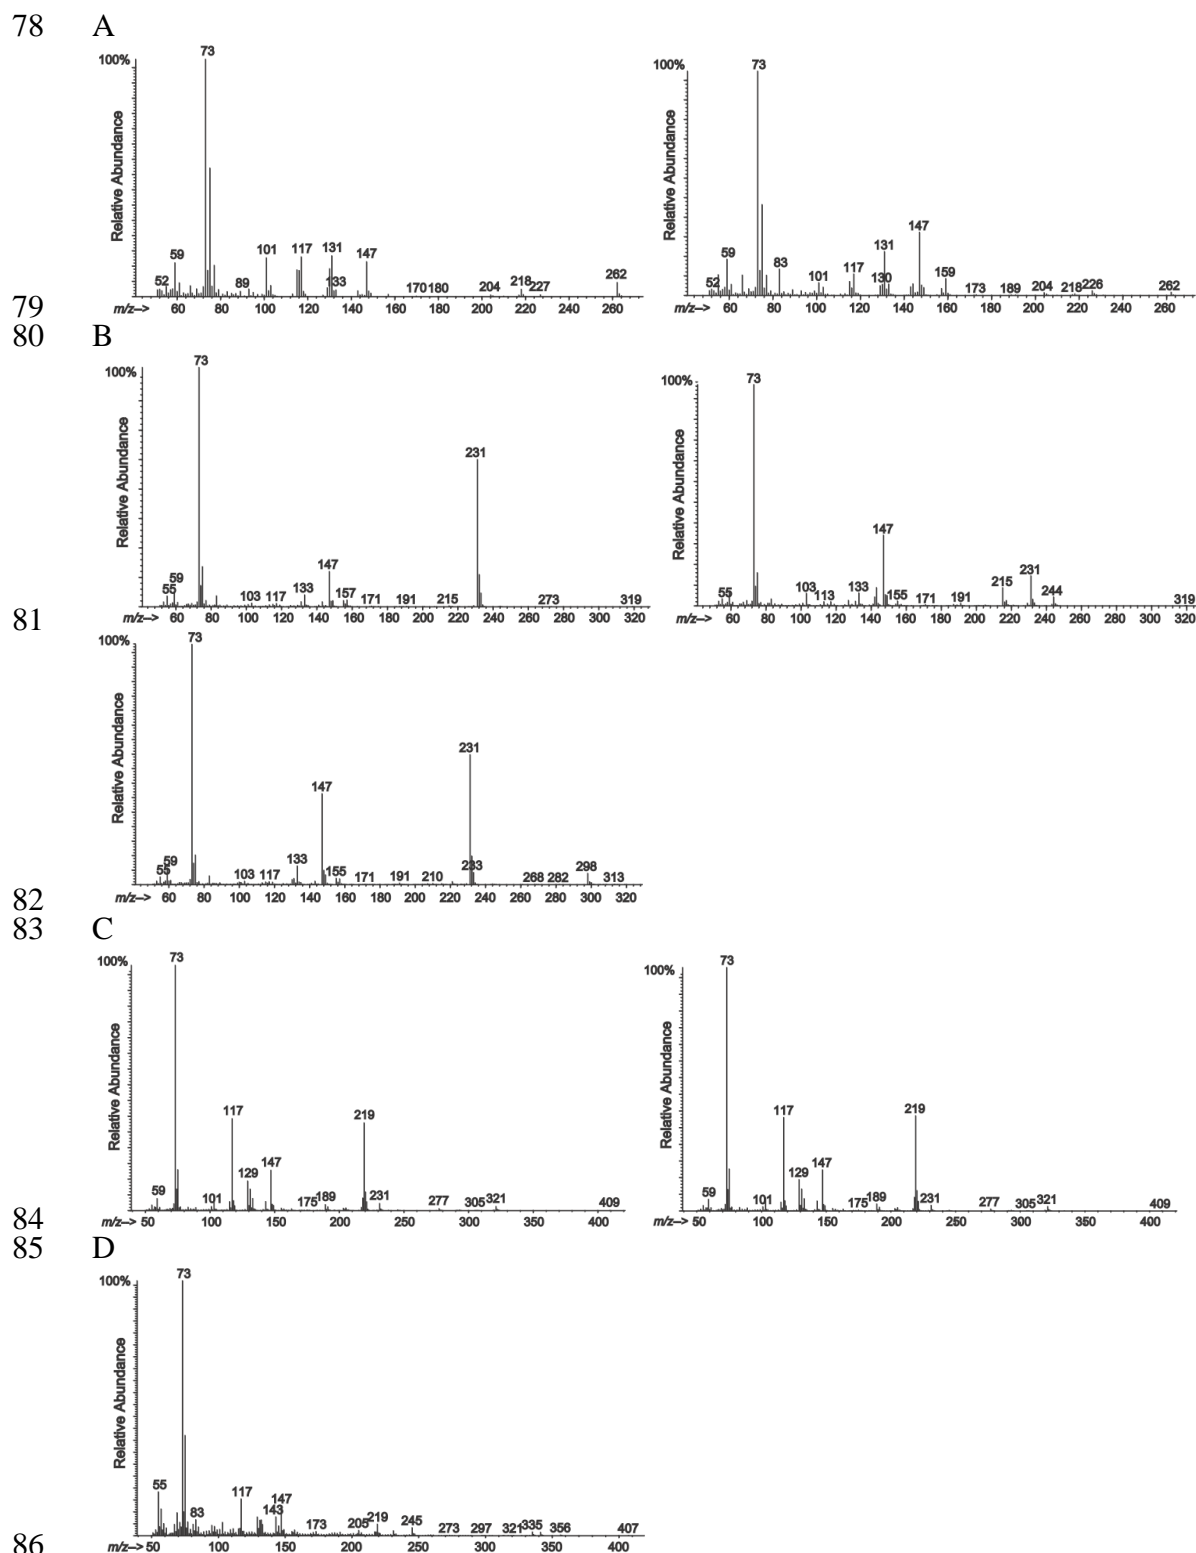

87 **Figure S6.** . GC/MS EI mass spectra corresponding to IEPOX-derived reaction products found  
 88 in a representative field sample collected from the southeastern United States during the summer  
 89 of 2010. (A) EIC of  $m/z$  262: 3-MeTHF-3,4-diols (B) EIC of  $m/z$  231: C<sub>5</sub>-alkene triols (C) EIC of  
 90  $m/z$  219: 2-methyltetrols (D) EIC of  $m/z$  335: dimers.

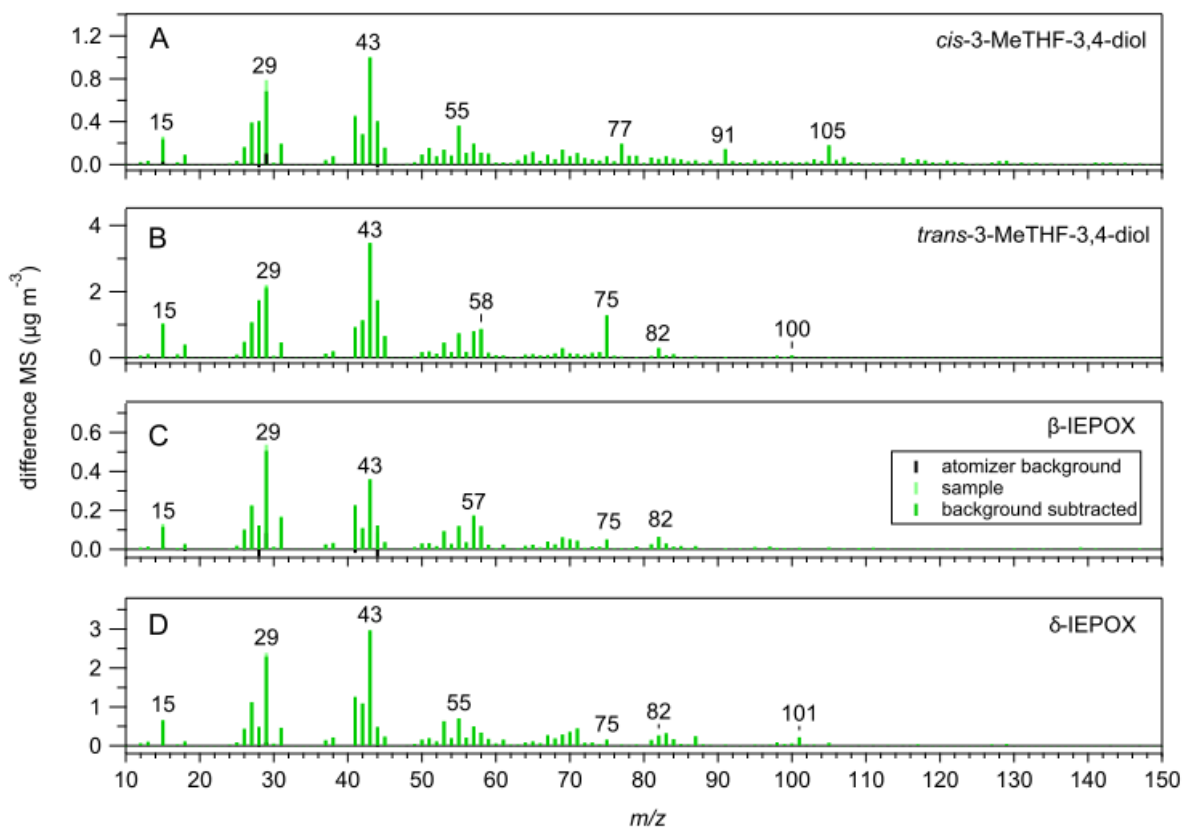

91  
 92 **Figure S7.** HR-AMS unit mass resolution (UMR) mass spectra of synthesized standards (A) *cis*-  
 93 3-MeTHF-3,4-diol, (B) *trans*-3-MeTHF-3,4-diol, (C)  $\beta$ -IEPOX, and (D)  $\delta$ -IEPOX. UMR spectra  
 94 of atomizer background, the synthesized standard, and that of the standard with the atomizer  
 95 background subtracted are shown.

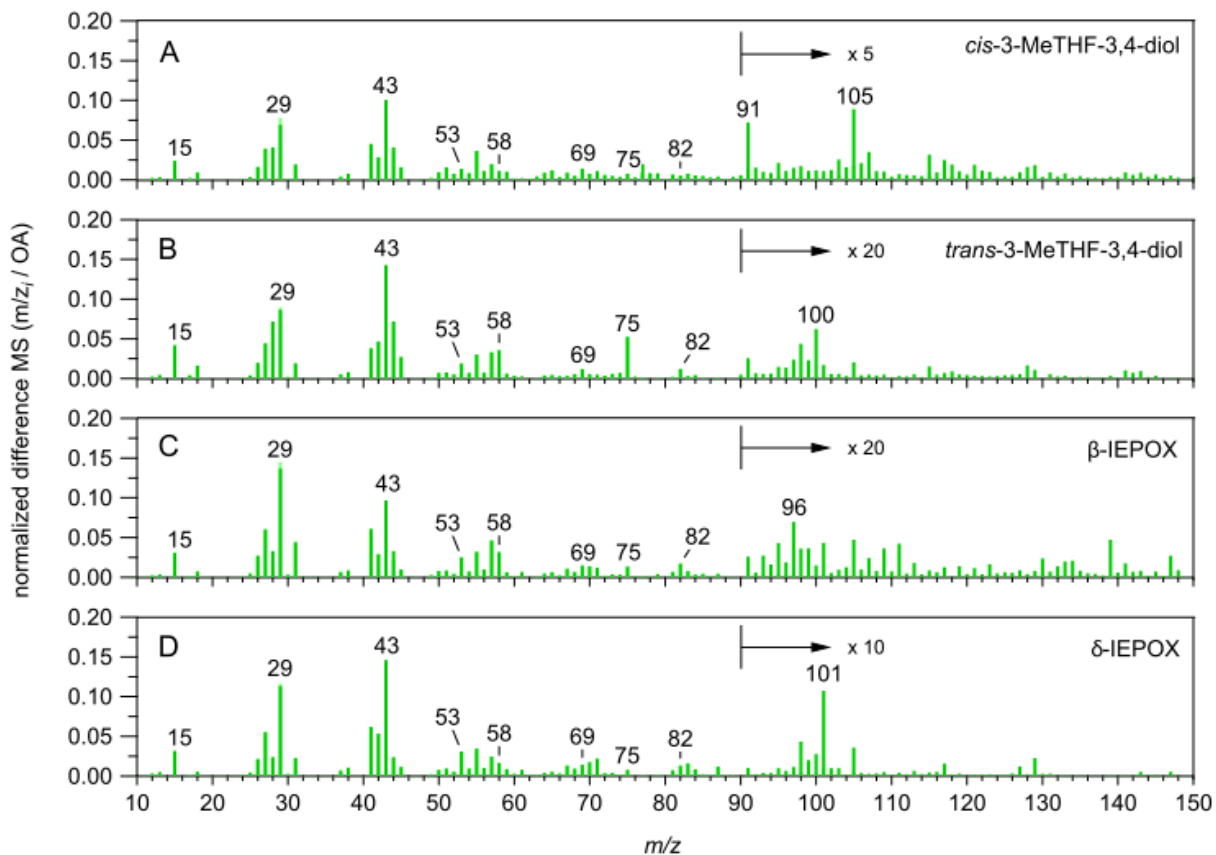

96

97 **Figure S8.** Background corrected HR-AMS unit mass resolution (UMR) mass spectra of

98 synthesized standards (A) *cis*-3-MeTHF-3,4-diol, (B) *trans*-3-MeTHF-3,4-diol, (C)  $\beta$ -IEPOX,

99 and (D)  $\delta$ -IEPOX that have been normalized by the total organic signal (i.e.,  $m/z_i/org$ ). As such,

100 these spectra show the relative contribution of each fragment to total organic signal. The

101 intensities of  $m/z > 90$  have been adjusted to clearly show the contribution and patterns of

102 fragments in that mass range.

103 **Reference:**

104 (1) Adam, W.; Peters, K.; Renz, M., Titanium-Catalyzed Diastereoselective Epoxidations of  
105 Ene Diols and Allylic Alcohols with  $\alpha$ -Hydroperoxy Alcohols as Novel Oxygen Donors. *J. Org.*  
106 *Chem.* **1997**, *62* (10), 3183-3189.

107 (2) Wu, A.; Cremer, D., Extension of the Karplus Relationship for NMR Spin-Spin Coupling  
108 Constants to Nonplanar Ring Systems: Pseudorotation of Tetrahydrofuran. *Int. J. Mol. Sci.* **2003**,  
109 *4* (4), 158-192.

110
